# Supplementary material for: Associations between Serum Folate Concentrations and Functional Disability in Older Adults
Source: Antioxidants (Basel). 2023 Mar 2;12(3):619. doi: 10.3390/antiox12030619 (PMC10045063; doi:10.3390/antiox12030619)
Supplement: Supplementary file 1 [file antioxidants-12-00619-s001.zip › Supplementary.pdf]

**Table S1.** Questions about self-reported functional disability.

| Functional disability domains                  | Questions <sup>a</sup>                                                                                                                                                                                                                      |
|------------------------------------------------|---------------------------------------------------------------------------------------------------------------------------------------------------------------------------------------------------------------------------------------------|
| Lower extremity mobility (LEM)                 | Walking for a quarter mile<br>Walking up 10 steps                                                                                                                                                                                           |
| Instrumental activities of daily living (IADL) | Managing money<br>Doing chores around the house<br>Preparing meals                                                                                                                                                                          |
| Activities of daily living (ADL)               | Eating<br>Dressing<br>Getting in and out of bed<br>Walking between rooms on the same floor                                                                                                                                                  |
| Leisure and social activities (LSA)            | Going out to shopping, movies, or events<br>Doing leisure activities at home<br>Participating in social activities                                                                                                                          |
| General physical activities (GPA)              | Stooping/crouching/kneeling<br>Standing on feet for about 2 hours<br>Sitting for about 2 hours<br>Standing up from an armless chair<br>Reaching up overhead<br>Using fingers to grasp/handle small objects<br>Lifting or carrying 10 pounds |

<sup>a</sup> Participants were asked: "By yourself and without using any special equipment, how much difficulty do you have ...?"

**Table S2.** The classifications of covariates.

| Covariates                                  | Classifications                                                                       |
|---------------------------------------------|---------------------------------------------------------------------------------------|
| Age                                         | 60–69; 70–79; ≥ 80                                                                    |
| Sex                                         | Male; Female                                                                          |
| Race/Ethnicity                              | Mexican American; Other Hispanic; Non-Hispanic White; Non-Hispanic Black; Other races |
| Educational level                           | Below high school; High school; Above high school                                     |
| Marital status                              | Not living alone; Living alone                                                        |
| Poverty-income ratio (PIR)                  | < 1; ≥ 1                                                                              |
| Physical activity <sup>a</sup>              | Low; High                                                                             |
| Body mass index (BMI)                       | < 25 kg/m <sup>2</sup> ; 25 to < 30 kg/m <sup>2</sup> ; ≥ 30 kg/m <sup>2</sup>        |
| Smoking status                              | Yes (Smoked at least 100 cigarettes in life); No                                      |
| Alcohol consumption                         | Yes (Had 4/5 or more drinks every day); No                                            |
| Total energy intake (kcal/day) <sup>b</sup> | Continuous                                                                            |
| Hypertension <sup>c</sup>                   | Yes; No                                                                               |
| Diabetes <sup>d</sup>                       | Yes; No                                                                               |
| Arthritis <sup>e</sup>                      | Yes; No                                                                               |
| Stroke <sup>e</sup>                         | Yes; No                                                                               |
| Gout <sup>e</sup>                           | Yes; No                                                                               |
| Cancer <sup>e</sup>                         | Yes; No                                                                               |
| Congestive heart failure <sup>e</sup>       | Yes; No                                                                               |
| Coronary heart disease <sup>e</sup>         | Yes; No                                                                               |
| Angina <sup>e</sup>                         | Yes; No                                                                               |
| Asthma <sup>e</sup>                         | Yes; No                                                                               |
| Chronic bronchitis <sup>e</sup>             | Yes; No                                                                               |
| Emphysema <sup>e</sup>                      | Yes; No                                                                               |

<sup>a</sup> Physical activity was calculated and classified into two categories: “low (< 600 MET minutes/week)” and “high (≥ 600 MET-minutes/week)” according to the Global Physical Activity Questionnaire analysis guide.

<sup>b</sup> Total energy intake of each participant was the average of two 24-hour dietary energy intake.

<sup>c</sup> Hypertension was defined as mean systolic blood pressure ≥ 130 mmHg, or mean diastolic blood pressure ≥ 80 mmHg, or ever been told have hypertension, or taking prescribed medicine now.

<sup>d</sup> Diabetes was defined as self-reported physician diagnosis, or taking insulin, or taking anti-diabetic pills.

<sup>e</sup> Arthritis, stroke, gout, cancer, congestive heart failure, coronary heart disease, angina, asthma, chronic bronchitis, and emphysema were defined as if self-reported by a physician diagnosis.

**Table S3.** Characteristics of participants by LEM, ADL, and LSA disability, NHANES 2011–2018 (*n* = 5850).

| Characteristics                                              | With LEM disability | Without LEM disability | <i>p</i> value | With ADL disability | Without ADL disability | <i>p</i> value | With LSA disability | Without LSA disability | <i>p</i> value |
|--------------------------------------------------------------|---------------------|------------------------|----------------|---------------------|------------------------|----------------|---------------------|------------------------|----------------|
| Number of participants, <i>n</i> (%)                         | 2441 (41.73)        | 3409 (58.27)           |                | 1552 (26.53)        | 4298 (73.47)           |                | 1430 (24.44)        | 4420 (75.56)           |                |
| Age (year), <i>n</i> (%) <sup>a</sup>                        |                     |                        | <0.001         |                     |                        | <0.001         |                     |                        | <0.001         |
| 60–69                                                        | 1041 (40.81)        | 1992 (61.91)           |                | 703 (43.53)         | 2330 (56.73)           |                | 627 (43.16)         | 2406 (56.61)           |                |
| 70–79                                                        | 747 (33.35)         | 975 (27.32)            |                | 445 (29.89)         | 1277 (29.57)           |                | 434 (31.20)         | 1288 (29.23)           |                |
| ≥ 80                                                         | 653 (25.85)         | 442 (10.77)            |                | 404 (26.57)         | 691 (13.70)            |                | 369 (25.64)         | 726 (14.16)            |                |
| Sex, <i>n</i> (%) <sup>a</sup>                               |                     |                        | <0.001         |                     |                        | 0.067          |                     |                        | <0.001         |
| Female                                                       | 1402 (62.93)        | 1544 (49.03)           |                | 820 (57.86)         | 2126 (53.38)           |                | 798 (62.07)         | 2148 (52.33)           |                |
| Male                                                         | 1039 (37.07)        | 1865 (50.97)           |                | 732 (42.14)         | 2172 (46.62)           |                | 632 (37.93)         | 2272 (47.67)           |                |
| Race/ethnicity, <i>n</i> (%) <sup>a</sup>                    |                     |                        | 0.002          |                     |                        | <0.001         |                     |                        | <0.001         |
| Mexican American                                             | 265 (4.35)          | 417 (4.05)             |                | 207 (5.94)          | 475 (3.65)             |                | 196 (5.98)          | 486 (3.68)             |                |
| Other Hispanic                                               | 237 (3.80)          | 402 (4.01)             |                | 190 (5.50)          | 449 (3.47)             |                | 153 (4.74)          | 486 (3.71)             |                |
| Non-Hispanic White                                           | 1130 (73.69)        | 1444 (77.93)           |                | 634 (68.13)         | 1940 (78.66)           |                | 620 (69.76)         | 1954 (78.05)           |                |
| Non-Hispanic Black                                           | 578 (10.51)         | 703 (7.38)             |                | 365 (11.72)         | 916 (7.68)             |                | 325 (11.12)         | 956 (7.91)             |                |
| Other races                                                  | 231 (7.65)          | 443 (6.63)             |                | 156 (8.71)          | 518 (6.54)             |                | 136 (8.39)          | 538 (6.66)             |                |
| Educational level, <i>n</i> (%) <sup>a</sup>                 |                     |                        | <0.001         |                     |                        | <0.001         |                     |                        | <0.001         |
| Below high school                                            | 799 (21.20)         | 833 (12.83)            |                | 554 (23.21)         | 1078 (13.98)           |                | 501 (22.16)         | 1131 (14.42)           |                |
| High school                                                  | 608 (28.55)         | 738 (21.97)            |                | 370 (26.39)         | 976 (23.96)            |                | 361 (29.50)         | 985 (23.17)            |                |
| Above high school                                            | 1027 (50.25)        | 1836 (65.20)           |                | 623 (50.40)         | 2240 (62.06)           |                | 564 (48.34)         | 2299 (62.41)           |                |
| Marital status, <i>n</i> (%) <sup>a</sup>                    |                     |                        | <0.001         |                     |                        | <0.001         |                     |                        | <0.001         |
| Not living alone                                             | 1142 (53.21)        | 2181 (69.24)           |                | 740 (54.29)         | 2583 (65.60)           |                | 676 (50.96)         | 2647 (66.31)           |                |
| Living alone                                                 | 1294 (46.79)        | 1227 (30.76)           |                | 810 (45.71)         | 1711 (34.40)           |                | 754 (49.04)         | 1767 (33.69)           |                |
| Poverty-income ratio, <i>n</i> (%) <sup>a</sup>              |                     |                        | <0.001         |                     |                        | <0.001         |                     |                        | <0.001         |
| < 1                                                          | 551 (14.70)         | 447 (6.10)             |                | 390 (15.77)         | 608 (7.58)             |                | 375 (17.47)         | 623 (7.26)             |                |
| ≥ 1                                                          | 1890 (85.30)        | 2962 (93.90)           |                | 1162 (84.23)        | 3690 (92.42)           |                | 1055 (82.53)        | 3797 (92.74)           |                |
| Physical activity, <i>n</i> (%) <sup>a</sup>                 |                     |                        | <0.001         |                     |                        | <0.001         |                     |                        | <0.001         |
| Low                                                          | 1674 (65.90)        | 1402 (35.99)           |                | 1056 (65.89)        | 2020 (42.17)           |                | 995 (66.36)         | 2081 (42.44)           |                |
| High                                                         | 747 (34.10)         | 1998 (64.01)           |                | 483 (34.11)         | 2262 (57.83)           |                | 424 (33.64)         | 2321 (57.56)           |                |
| Body mass index, <i>n</i> (%) <sup>a</sup>                   |                     |                        | <0.001         |                     |                        | <0.001         |                     |                        | <0.001         |
| < 25 kg/m <sup>2</sup>                                       | 466 (19.20)         | 991 (26.06)            |                | 287 (18.21)         | 1170 (24.92)           |                | 275 (18.38)         | 1182 (24.79)           |                |
| 25 to < 30 kg/m <sup>2</sup>                                 | 710 (29.18)         | 1360 (40.96)           |                | 471 (32.03)         | 1599 (37.75)           |                | 425 (31.46)         | 1645 (37.82)           |                |
| ≥ 30 kg/m <sup>2</sup>                                       | 1173 (51.62)        | 1041 (32.98)           |                | 717 (49.76)         | 1497 (37.33)           |                | 664 (50.17)         | 1550 (37.40)           |                |
| Smoking status, <i>n</i> (%) <sup>a</sup>                    | 1316 (53.75)        | 1591 (47.26)           | 0.003          | 836 (54.67)         | 2071 (48.34)           | 0.011          | 780 (55.12)         | 2127 (48.33)           | 0.002          |
| Alcohol consumption, <i>n</i> (%) <sup>a</sup>               | 404 (19.11)         | 431 (14.69)            | 0.014          | 282 (24.02)         | 553 (14.24)            | <0.001         | 242 (19.79)         | 593 (15.45)            | 0.045          |
| Hypertension, <i>n</i> (%) <sup>a</sup>                      | 2082 (82.45)        | 2607 (73.50)           | <0.001         | 1323 (83.91)        | 3366 (74.93)           | <0.001         | 1246 (86.06)        | 3443 (74.51)           | <0.001         |
| Diabetes, <i>n</i> (%) <sup>a</sup>                          | 842 (29.06)         | 762 (17.41)            | <0.001         | 559 (29.94)         | 1045 (19.58)           | <0.001         | 502 (29.47)         | 1102 (19.88)           | <0.001         |
| Arthritis, <i>n</i> (%) <sup>a</sup>                         | 1636 (68.42)        | 1268 (42.83)           | <0.001         | 1094 (71.70)        | 1810 (47.17)           | <0.001         | 999 (72.47)         | 1905 (47.39)           | <0.001         |
| Stroke, <i>n</i> (%) <sup>a</sup>                            | 347 (12.61)         | 134 (3.52)             | <0.001         | 255 (14.95)         | 226 (4.73)             | <0.001         | 232 (14.28)         | 249 (5.08)             | <0.001         |
| Gout, <i>n</i> (%) <sup>a</sup>                              | 300 (10.98)         | 249 (9.10)             | 0.175          | 204 (13.22)         | 345 (8.84)             | <0.001         | 179 (12.23)         | 370 (9.18)             | 0.005          |
| Cancer, <i>n</i> (%) <sup>a</sup>                            | 549 (27.35)         | 635 (23.66)            | 0.089          | 341 (27.76)         | 843 (24.30)            | 0.081          | 308 (27.36)         | 876 (24.47)            | 0.132          |
| Congestive heart failure, <i>n</i> (%) <sup>a</sup>          | 331 (11.77)         | 101 (2.75)             | <0.001         | 211 (10.99)         | 221 (4.84)             | <0.001         | 198 (11.21)         | 234 (4.89)             | <0.001         |
| Coronary heart disease, <i>n</i> (%) <sup>a</sup>            | 359 (16.45)         | 225 (6.77)             | <0.001         | 208 (12.95)         | 376 (9.77)             | 0.035          | 210 (14.45)         | 374 (9.43)             | 0.004          |
| Angina, <i>n</i> (%) <sup>a</sup>                            | 210 (10.09)         | 106 (2.63)             | <0.001         | 132 (9.47)          | 184 (4.35)             | <0.001         | 134 (9.82)          | 182 (4.35)             | <0.001         |
| Asthma, <i>n</i> (%) <sup>a</sup>                            | 467 (19.63)         | 348 (11.14)            | <0.001         | 300 (21.46)         | 515 (12.37)            | <0.001         | 285 (21.32)         | 530 (12.57)            | <0.001         |
| Chronic bronchitis, <i>n</i> (%) <sup>a</sup>                | 291 (14.09)         | 138 (5.32)             | <0.001         | 177 (13.12)         | 252 (7.42)             | <0.001         | 175 (14.11)         | 254 (7.26)             | <0.001         |
| Emphysema, <i>n</i> (%) <sup>a</sup>                         | 170 (7.91)          | 64 (2.13)              | <0.001         | 102 (8.37)          | 132 (3.21)             | <0.001         | 114 (9.57)          | 120 (2.98)             | <0.001         |
| Total energy intake (kcal/day), median (IQR) <sup>b</sup>    | 1678.5 (819.5)      | 1786 (878.5)           | <0.001         | 1686.5 (866.5)      | 1754 (848)             | 0.007          | 1683.5 (842.5)      | 1753 (856.5)           | <0.001         |
| Total folate (nmol/L), median (IQR) <sup>b</sup>             | 42.3 (41.6)         | 45.8 (38.6)            | <0.001         | 41.8 (39.2)         | 45.4 (40.2)            | <0.001         | 41.7 (39.5)         | 45.4 (40)              | <0.001         |
| 5-Methyltetrahydrofolate (nmol/L), median (IQR) <sup>b</sup> | 39.5 (39.5)         | 43.3 (36.4)            | <0.001         | 38.9 (37)           | 43 (38.3)              | <0.001         | 38.9 (37.6)         | 42.8 (38)              | <0.001         |

Data are the number of participants (weighted percentage) or medians (interquartile ranges). <sup>a</sup> Chi-square test was used to compare the percentage between participants with and without functional disability. <sup>b</sup> Mann–Whitney *U* test was used to compare the difference between participants with and without functional disability.

**Table S4.** Comparison of several serum folate concentrations by sex.

|                          | Females           | Males             | <i>p</i> value |
|--------------------------|-------------------|-------------------|----------------|
| 5-Methyltetrahydrofolate | 45.0 (28.2, 70.9) | 38.7 (25.7, 58.9) | <0.001         |
| Total folate             | 47.8 (30.5, 75.3) | 41.2 (27.9, 62.5) | <0.001         |
| Combined total folate    | 50.3 (32.9, 77.7) | 43.7 (29.9, 65.3) | <0.001         |

Data are presented with medians (P25, P75).

**Table S5.** Weighted odds ratios (95% confidence intervals) for all domains of functional disability across quartiles of total folate.

|                       | Quartile of total folate |                     |                     |                     |
|-----------------------|--------------------------|---------------------|---------------------|---------------------|
|                       | Q1                       | Q2                  | Q3                  | Q4                  |
| LEM                   |                          |                     |                     |                     |
| Cases/Participants    | 696/1467                 | 607/1465            | 546/1460            | 592/1458            |
| Age-adjusted          | Ref.                     | 0.76 (0.62–0.94) *  | 0.60 (0.47–0.77) ** | 0.66 (0.55–0.80) ** |
| Multivariate-adjusted | Ref.                     | 1.03 (0.77–1.39)    | 0.82 (0.57–1.19)    | 0.93 (0.71–1.23)    |
| IADL                  |                          |                     |                     |                     |
| Cases/Participants    | 483/1467                 | 442/1465            | 379/1460            | 399/1458            |
| Age-adjusted          | Ref.                     | 0.78 (0.61–1.00)    | 0.65 (0.50–0.85) ** | 0.57 (0.43–0.75) ** |
| Multivariate-adjusted | Ref.                     | 0.88 (0.62–1.24)    | 0.80 (0.57–1.13)    | 0.65 (0.46–0.90) *  |
| ADL                   |                          |                     |                     |                     |
| Cases/Participants    | 434/1467                 | 402/1465            | 359/1460            | 357/1458            |
| Age-adjusted          | Ref.                     | 0.81 (0.61–1.08)    | 0.80 (0.60–1.06)    | 0.73 (0.56–0.94) *  |
| Multivariate-adjusted | Ref.                     | 0.97 (0.68–1.39)    | 1.07 (0.73–1.57)    | 0.86 (0.61–1.20)    |
| LSA                   |                          |                     |                     |                     |
| Cases/Participants    | 414/1467                 | 367/1465            | 323/1460            | 326/1458            |
| Age-adjusted          | Ref.                     | 0.75 (0.57–0.99) *  | 0.69 (0.53–0.90) ** | 0.62 (0.44–0.86) ** |
| Multivariate-adjusted | Ref.                     | 0.82 (0.58–1.17)    | 0.88 (0.61–1.27)    | 0.75 (0.49–1.13)    |
| GPA                   |                          |                     |                     |                     |
| Cases/Participants    | 974/1467                 | 918/1465            | 875/1460            | 932/1458            |
| Age-adjusted          | Ref.                     | 0.70 (0.56–0.87) ** | 0.64 (0.50–0.83) ** | 0.67 (0.52–0.86) ** |
| Multivariate-adjusted | Ref.                     | 0.70 (0.51–0.97) *  | 0.66 (0.44–0.99) *  | 0.72 (0.52–1.00)    |

Calculated using binary logistic regression models. Q, quartile. The multivariate-adjusted model adjusted for age, race/ethnicity, educational level, marital status, PIR, physical activity, alcohol consumption, smoking status, BMI, hypertension, diabetes, arthritis, stroke, gout, cancer, congestive heart failure, coronary heart disease, angina, asthma, chronic bronchitis, emphysema, and total energy intake. Q1: <30.5 nmol/L for females and <27.9 nmol/L for males; Q2: 30.5–47.8 nmol/L for females and 27.9–41.2 nmol/L for males; Q3: 47.8–75.3 nmol/L for females and 41.2–62.5 nmol/L for males; Q4: ≥75.3 nmol/L for females and ≥62.5 nmol/L for males. \*  $p < 0.05$ ; \*\*  $p < 0.01$ .

**Table S6.** Weighted odds ratios (95% confidence intervals) for all domains of functional disability across quartiles of total folate in females.

|                       | Quartile of total folate |                     |                     |                     |
|-----------------------|--------------------------|---------------------|---------------------|---------------------|
|                       | Q1                       | Q2                  | Q3                  | Q4                  |
| LEM                   |                          |                     |                     |                     |
| Cases/Participants    | 416/737                  | 349/737             | 306/739             | 331/733             |
| Age-adjusted          | Ref.                     | 0.82 (0.58–1.16)    | 0.58 (0.41–0.83) ** | 0.55 (0.41–0.73) ** |
| Multivariate-adjusted | Ref.                     | 1.02 (0.61–1.72)    | 0.81 (0.45–1.44)    | 0.72 (0.46–1.12)    |
| IADL                  |                          |                     |                     |                     |
| Cases/Participants    | 303/737                  | 253/737             | 212/739             | 234/733             |
| Age-adjusted          | Ref.                     | 0.65 (0.50–0.86) ** | 0.49 (0.36–0.67) ** | 0.47 (0.34–0.65) ** |
| Multivariate-adjusted | Ref.                     | 0.71 (0.46–1.12)    | 0.55 (0.38–0.81) ** | 0.53 (0.35–0.78) ** |
| ADL                   |                          |                     |                     |                     |
| Cases/Participants    | 244/737                  | 209/737             | 180/739             | 187/733             |
| Age-adjusted          | Ref.                     | 0.73 (0.51–1.07)    | 0.68 (0.48–0.98) *  | 0.69 (0.47–1.02)    |
| Multivariate-adjusted | Ref.                     | 0.84 (0.50–1.41)    | 0.77 (0.45–1.33)    | 0.75 (0.41–1.36)    |
| LSA                   |                          |                     |                     |                     |
| Cases/Participants    | 240/737                  | 206/737             | 167/739             | 185/733             |
| Age-adjusted          | Ref.                     | 0.70 (0.50–0.98) *  | 0.58 (0.40–0.86) ** | 0.61 (0.43–0.87) ** |
| Multivariate-adjusted | Ref.                     | 0.74 (0.47–1.17)    | 0.68 (0.38–1.20)    | 0.73 (0.45–1.16)    |
| GPA                   |                          |                     |                     |                     |
| Cases/Participants    | 572/737                  | 504/737             | 483/739             | 495/733             |
| Age-adjusted          | Ref.                     | 0.48 (0.33–0.70) ** | 0.49 (0.34–0.70) ** | 0.44 (0.30–0.63) ** |
| Multivariate-adjusted | Ref.                     | 0.46 (0.27–0.77) ** | 0.54 (0.30–0.96) *  | 0.50 (0.32–0.77) ** |

Calculated using binary logistic regression models. The multivariate-adjusted model adjusted for age, race/ethnicity, educational level, marital status, PIR, physical activity, alcohol consumption, smoking status, BMI, hypertension, diabetes, arthritis, stroke, gout, cancer, congestive heart failure, coronary heart disease, angina, asthma, chronic bronchitis, emphysema, and total energy intake. Q1: <30.5 nmol/L; Q2: 30.5–47.8 nmol/L; Q3: 47.8–75.3 nmol/L; Q4: ≥75.3 nmol/L. \* $p < 0.05$ ; \*\* $p < 0.01$ .

**Table S7.** Weighted odds ratios (95% confidence intervals) for all domains of functional disability across quartiles of 5-Methyltetrahydrofolate in males.

|                       | Quartile of 5-Methyltetrahydrofolate |                    |                    |                  |
|-----------------------|--------------------------------------|--------------------|--------------------|------------------|
|                       | Q1                                   | Q2                 | Q3                 | Q4               |
| LEM                   |                                      |                    |                    |                  |
| Cases/Participants    | 284/732                              | 255/723            | 242/724            | 258/725          |
| Age-adjusted          | Ref.                                 | 0.65 (0.45–0.96) * | 0.61 (0.42–0.90) * | 0.85 (0.59–1.23) |
| Multivariate-adjusted | Ref.                                 | 1.17 (0.74–1.85)   | 0.91 (0.58–1.41)   | 1.34 (0.78–2.32) |
| IADL                  |                                      |                    |                    |                  |
| Cases/Participants    | 181/732                              | 188/723            | 168/724            | 164/725          |
| Age-adjusted          | Ref.                                 | 1.07 (0.71–1.62)   | 1.02 (0.65–1.59)   | 0.80 (0.53–1.21) |
| Multivariate-adjusted | Ref.                                 | 1.52 (0.79–2.92)   | 1.55 (0.93–2.60)   | 1.06 (0.58–1.92) |
| ADL                   |                                      |                    |                    |                  |
| Cases/Participants    | 195/732                              | 192/723            | 175/724            | 170/725          |
| Age-adjusted          | Ref.                                 | 0.92 (0.63–1.34)   | 0.86 (0.54–1.38)   | 0.74 (0.52–1.06) |
| Multivariate-adjusted | Ref.                                 | 1.30 (0.82–2.08)   | 1.29 (0.76–2.18)   | 1.01 (0.65–1.58) |
| LSA                   |                                      |                    |                    |                  |
| Cases/Participants    | 176/732                              | 159/723            | 156/724            | 141/725          |
| Age-adjusted          | Ref.                                 | 0.91 (0.61–1.34)   | 0.86 (0.60–1.24)   | 0.66 (0.43–1.01) |
| Multivariate-adjusted | Ref.                                 | 1.39 (0.78–2.48)   | 1.31 (0.91–1.89)   | 0.86 (0.48–1.53) |
| GPA                   |                                      |                    |                    |                  |
| Cases/Participants    | 404/732                              | 411/723            | 402/724            | 428/725          |
| Age-adjusted          | Ref.                                 | 0.97 (0.65–1.44)   | 0.82 (0.54–1.24)   | 0.96 (0.67–1.38) |
| Multivariate-adjusted | Ref.                                 | 1.08 (0.65–1.80)   | 0.72 (0.42–1.23)   | 0.92 (0.57–1.47) |

Calculated using binary logistic regression models. The multivariate-adjusted model adjusted for age, race/ethnicity, educational level, marital status, PIR, physical activity, alcohol consumption, smoking status, BMI, hypertension, diabetes, arthritis, stroke, gout, cancer, congestive heart failure, coronary heart disease, angina, asthma, chronic bronchitis, emphysema, and total energy intake. Q1: <25.7 nmol/L; Q2: 25.7–38.7 nmol/L; Q3: 38.7–58.9 nmol/L; Q4: ≥58.9 nmol/L. \* $p < 0.05$ .

**Table S8.** Weighted odds ratios (95% confidence intervals) for all domains of functional disability across quartiles of total folate in males.

|                       | Quartile of total folate |                    |                    |                  |
|-----------------------|--------------------------|--------------------|--------------------|------------------|
|                       | Q1                       | Q2                 | Q3                 | Q4               |
| LEM                   |                          |                    |                    |                  |
| Cases/Participants    | 280/730                  | 258/728            | 240/721            | 261/725          |
| Age-adjusted          | Ref.                     | 0.67 (0.46–0.96) * | 0.66 (0.45–0.95) * | 0.89 (0.62–1.26) |
| Multivariate-adjusted | Ref.                     | 1.09 (0.74–1.61)   | 0.93 (0.60–1.45)   | 1.36 (0.80–2.31) |
| IADL                  |                          |                    |                    |                  |
| Cases/Participants    | 180/730                  | 189/728            | 167/721            | 165/725          |
| Age-adjusted          | Ref.                     | 1.05 (0.70–1.58)   | 1.07 (0.69–1.65)   | 0.81 (0.53–1.24) |
| Multivariate-adjusted | Ref.                     | 1.41 (0.79–2.52)   | 1.60 (0.95–2.69)   | 1.06 (0.58–1.92) |
| ADL                   |                          |                    |                    |                  |
| Cases/Participants    | 190/730                  | 193/728            | 179/721            | 170/725          |
| Age-adjusted          | Ref.                     | 0.94 (0.66–1.35)   | 0.98 (0.63–1.54)   | 0.78 (0.54–1.14) |
| Multivariate-adjusted | Ref.                     | 1.31 (0.82–2.10)   | 1.50 (0.87–2.59)   | 1.08 (0.67–1.73) |
| LSA                   |                          |                    |                    |                  |
| Cases/Participants    | 174/730                  | 161/728            | 156/721            | 141/725          |
| Age-adjusted          | Ref.                     | 0.83 (0.57–1.22)   | 0.90 (0.63–1.29)   | 0.66 (0.42–1.01) |
| Multivariate-adjusted | Ref.                     | 1.09 (0.62–1.91)   | 1.29 (0.88–1.88)   | 0.81 (0.45–1.45) |
| GPA                   |                          |                    |                    |                  |
| Cases/Participants    | 402/730                  | 414/728            | 392/721            | 437/725          |
| Age-adjusted          | Ref.                     | 0.97 (0.66–1.43)   | 0.86 (0.57–1.31)   | 1.04 (0.72–1.49) |
| Multivariate-adjusted | Ref.                     | 1.03 (0.63–1.69)   | 0.75 (0.45–1.26)   | 0.98 (0.61–1.58) |

Calculated using binary logistic regression models. The multivariate-adjusted model adjusted for age, race/ethnicity, educational level, marital status, PIR, physical activity, alcohol consumption, smoking status, BMI, hypertension, diabetes, arthritis, stroke, gout, cancer, congestive heart failure, coronary heart disease, angina, asthma, chronic bronchitis, emphysema, and total energy intake. Q1: <27.9 nmol/L; Q2: 27.9–41.2 nmol/L; Q3: 41.2–62.5 nmol/L; Q4: ≥62.5 nmol/L. \* $p < 0.05$ .

**Table S9.** Sensitivity analyses of weighted odds ratios (95% confidence intervals) for functional disability across quartiles of combined total folate.

|      |      | Quartile of combined total folate |                  |                    |    |
|------|------|-----------------------------------|------------------|--------------------|----|
|      |      | Q1                                | Q2               | Q3                 | Q4 |
| LEM  | Ref. | 1.10 (0.80–1.50)                  | 0.88 (0.60–1.31) | 0.97 (0.72–1.31)   |    |
| IADL | Ref. | 1.00 (0.70–1.44)                  | 0.81 (0.57–1.17) | 0.69 (0.51–0.95) * |    |
| ADL  | Ref. | 1.03 (0.71–1.50)                  | 1.08 (0.73–1.60) | 0.89 (0.63–1.26)   |    |
| LSA  | Ref. | 0.81 (0.57–1.16)                  | 0.87 (0.61–1.25) | 0.75 (0.50–1.13)   |    |
| GPA  | Ref. | 0.70 (0.51–0.97) *                | 0.70 (0.47–1.04) | 0.68 (0.49–0.95) * |    |

Calculated using binary logistic regression models. Model adjusted for age, race/ethnicity, educational level, marital status, PIR, physical activity, alcohol consumption, smoking status, BMI, hypertension, diabetes, arthritis, stroke, gout, cancer, congestive heart failure, coronary heart disease, angina, asthma, chronic bronchitis, emphysema, and total energy intake. Q1: <32.9 nmol/L for females and <29.9 nmol/L for males; Q2: 32.9–50.3 nmol/L for females and 29.9–43.7 nmol/L for males; Q3: 50.3–77.7 nmol/L for females and 43.7–65.3 nmol/L for males; Q4: ≥77.7 nmol/L for females and ≥65.3 nmol/L for males. \*  $p < 0.05$ .

**Table S10.** Sensitivity analyses of weighted odds ratios (95% confidence intervals) for functional disability across quartiles of serum folate after excluding participants using antibiotics, estrogens, and anticonvulsants.

|                                   |      | Quartile of serum folate concentrations |                  |                     |    |
|-----------------------------------|------|-----------------------------------------|------------------|---------------------|----|
|                                   |      | Q1                                      | Q2               | Q3                  | Q4 |
| 5-Methyltetrahydrofolate (nmol/L) |      |                                         |                  |                     |    |
| LEM                               | Ref. | 1.01 (0.75–1.36)                        | 0.81 (0.55–1.19) | 0.99 (0.69–1.41)    |    |
| IADL                              | Ref. | 0.90 (0.60–1.36)                        | 0.77 (0.53–1.11) | 0.66 (0.45–0.95) *  |    |
| ADL                               | Ref. | 0.89 (0.57–1.38)                        | 0.85 (0.57–1.28) | 0.78 (0.55–1.10)    |    |
| LSA                               | Ref. | 0.82 (0.54–1.23)                        | 0.85 (0.58–1.25) | 0.61 (0.37–1.00) *  |    |
| GPA                               | Ref. | 0.71 (0.50–1.02)                        | 0.68 (0.44–1.06) | 0.70 (0.49–0.99) *  |    |
| Total folate (nmol/L)             |      |                                         |                  |                     |    |
| LEM                               | Ref. | 1.05 (0.79–1.40)                        | 0.86 (0.59–1.27) | 1.07 (0.75–1.51)    |    |
| IADL                              | Ref. | 0.82 (0.57–1.17)                        | 0.83 (0.58–1.20) | 0.63 (0.45–0.89) ** |    |
| ADL                               | Ref. | 0.88 (0.58–1.34)                        | 1.00 (0.66–1.52) | 0.80 (0.56–1.14)    |    |
| LSA                               | Ref. | 0.75 (0.52–1.10)                        | 0.91 (0.61–1.36) | 0.62 (0.39–0.99) *  |    |
| GPA                               | Ref. | 0.64 (0.44–0.91) *                      | 0.67 (0.44–1.03) | 0.71 (0.50–1.00) *  |    |

Calculated using binary logistic regression models. Model adjusted for age, race/ethnicity, educational level, marital status, PIR, physical activity, alcohol consumption, smoking status, BMI, hypertension, diabetes, arthritis, stroke, gout, cancer, congestive heart failure, coronary heart disease, angina, asthma, chronic bronchitis, emphysema, and total energy intake. 5-Methyltetrahydrofolate: Q1: <28.5 nmol/L for females and <26.1 nmol/L for males; Q2: 28.5–45.0 nmol/L for females and 26.1–38.9 nmol/L for males; Q3: 45.0–70.8 nmol/L for females and 38.9–58.9 nmol/L for males; Q4: ≥70.8 nmol/L for females and ≥58.9 nmol/L for males. Total folate: Q1: <30.6 nmol/L for females and <28.1 nmol/L for males; Q2: 30.6–47.7 nmol/L for females and 28.1–41.4 nmol/L for males; Q3: 47.7–75.0 nmol/L for females and 41.4–62.5 nmol/L for males; Q4: ≥75.0 nmol/L for females and ≥62.5 nmol/L for males. \*  $p < 0.05$ ; \*\*  $p < 0.01$ .

**Table S11.** Sensitivity analyses of weighted odds ratios (95% confidence intervals) for functional disability across quartiles of serum folate after excluding participants suffering from malnutrition <sup>a</sup>.

|                                   |      | Quartile of serum folate concentrations |                    |                     |    |
|-----------------------------------|------|-----------------------------------------|--------------------|---------------------|----|
|                                   |      | Q1                                      | Q2                 | Q3                  | Q4 |
| 5-Methyltetrahydrofolate (nmol/L) |      |                                         |                    |                     |    |
| LEM                               | Ref. | 1.04 (0.77–1.41)                        | 0.82 (0.58–1.17)   | 0.86 (0.64–1.14)    |    |
| IADL                              | Ref. | 0.94 (0.64–1.38)                        | 0.74 (0.53–1.04)   | 0.62 (0.43–0.88) ** |    |
| ADL                               | Ref. | 1.03 (0.70–1.53)                        | 0.97 (0.66–1.43)   | 0.83 (0.58–1.20)    |    |
| LSA                               | Ref. | 0.93 (0.62–1.39)                        | 0.92 (0.62–1.35)   | 0.72 (0.45–1.16)    |    |
| GPA                               | Ref. | 0.76 (0.56–1.04)                        | 0.67 (0.44–1.02)   | 0.69 (0.50–0.96) *  |    |
| Total folate (nmol/L)             |      |                                         |                    |                     |    |
| LEM                               | Ref. | 1.09 (0.81–1.46)                        | 0.83 (0.56–1.22)   | 0.98 (0.74–1.30)    |    |
| IADL                              | Ref. | 0.92 (0.64–1.32)                        | 0.78 (0.55–1.11)   | 0.66 (0.47–0.92) *  |    |
| ADL                               | Ref. | 1.01 (0.70–1.45)                        | 1.06 (0.72–1.57)   | 0.85 (0.59–1.24)    |    |
| LSA                               | Ref. | 0.87 (0.59–1.26)                        | 0.92 (0.63–1.36)   | 0.77 (0.49–1.22)    |    |
| GPA                               | Ref. | 0.69 (0.50–0.96) *                      | 0.65 (0.43–0.98) * | 0.73 (0.52–1.01)    |    |

<sup>a</sup> Based on previous literature [1], participants were considered malnutrition if they met at least three of the five criteria listed below: (1) serum albumin  $\leq 37$  g/L, (2) male weight  $\leq 63.9$  kg, female weight  $\leq 51.8$  kg, (3) serum cholesterol  $< 4.1$  mmol/L, (4) energy intake  $< 15$  kcal/kg/day, and (5) protein intake  $< 0.5$  g/kg/day. Calculated using binary logistic regression models. Model adjusted for age, race/ethnicity, educational level, marital status, PIR, physical activity, alcohol consumption, smoking status, BMI, hypertension, diabetes, arthritis, stroke, gout, cancer, congestive heart failure, coronary heart disease, angina, asthma, chronic bronchitis, emphysema, and total energy intake. 5-Methyltetrahydrofolate: Q1:  $< 28.5$  nmol/L for females and  $< 26.1$  nmol/L for males; Q2: 28.5–45.1 nmol/L for females and 26.1–38.9 nmol/L for males; Q3: 45.1–71.1 nmol/L for females and 38.9–59.0 nmol/L for males; Q4:  $\geq 71.1$  nmol/L for females and  $\geq 59.0$  nmol/L for males. Total folate: Q1:  $< 30.7$  nmol/L for females and  $< 28.2$  nmol/L for males; Q2: 30.7–48.1 nmol/L for females and 28.2–41.4 nmol/L for males; Q3: 48.1–75.5 nmol/L for females and 41.4–62.5 nmol/L for males; Q4:  $\geq 75.5$  nmol/L for females and  $\geq 62.5$  nmol/L for males. \*  $p < 0.05$ ; \*\*  $p < 0.01$ .

**Table S12.** Sensitivity analyses of weighted odds ratios (95% confidence intervals) for functional disability across quartiles of dietary folate intake.

|      |      | Quartile of dietary folate intake |                    |                     |    |
|------|------|-----------------------------------|--------------------|---------------------|----|
|      |      | Q1                                | Q2                 | Q3                  | Q4 |
| LEM  | Ref. | 1.00 (0.72–1.38)                  | 0.75 (0.54–1.05)   | 0.76 (0.52–1.12)    |    |
| IADL | Ref. | 1.08 (0.76–1.54)                  | 0.68 (0.50–0.93) * | 0.62 (0.45–0.86) ** |    |
| ADL  | Ref. | 0.95 (0.60–1.50)                  | 0.79 (0.54–1.14)   | 0.76 (0.53–1.11)    |    |
| LSA  | Ref. | 1.09 (0.75–1.58)                  | 0.90 (0.64–1.25)   | 1.00 (0.71–1.40)    |    |
| GPA  | Ref. | 1.01 (0.71–1.44)                  | 0.72 (0.52–1.01)   | 0.96 (0.68–1.37)    |    |

Calculated using binary logistic regression models. Model adjusted for sex, age, race/ethnicity, educational level, marital status, PIR, physical activity, alcohol consumption, smoking status, BMI, hypertension, diabetes, arthritis, stroke, gout, cancer, congestive heart failure, coronary heart disease, angina, asthma, chronic bronchitis, emphysema, and total energy intake. Q1:  $< 296.5$  DFE (mcg); Q2: 296.5–409.5 DFE (mcg); Q3: 409.5–581.5 DFE (mcg); Q4:  $\geq 581.5$  DFE (mcg). \*  $p < 0.05$ ; \*\*  $p < 0.01$ .

**Table S13.** Sensitivity analyses of the association between folate supplement users and non-supplement users with functional disability.

|      | Non-supplement users | Supplement users   |
|------|----------------------|--------------------|
| LEM  | Ref.                 | 1.22 (0.96–1.55)   |
| IADL | Ref.                 | 0.82 (0.63–1.08)   |
| ADL  | Ref.                 | 0.78 (0.64–0.96) * |
| LSA  | Ref.                 | 0.88 (0.66–1.17)   |
| GPA  | Ref.                 | 0.97 (0.77–1.22)   |

Calculated using binary logistic regression models. Model adjusted for sex, age, race/ethnicity, educational level, marital status, PIR, physical activity, alcohol consumption, smoking status, BMI, hypertension, diabetes, arthritis, stroke, gout, cancer, congestive heart failure, coronary heart disease, angina, asthma, chronic bronchitis, emphysema, and total energy intake. \* $p < 0.05$ .

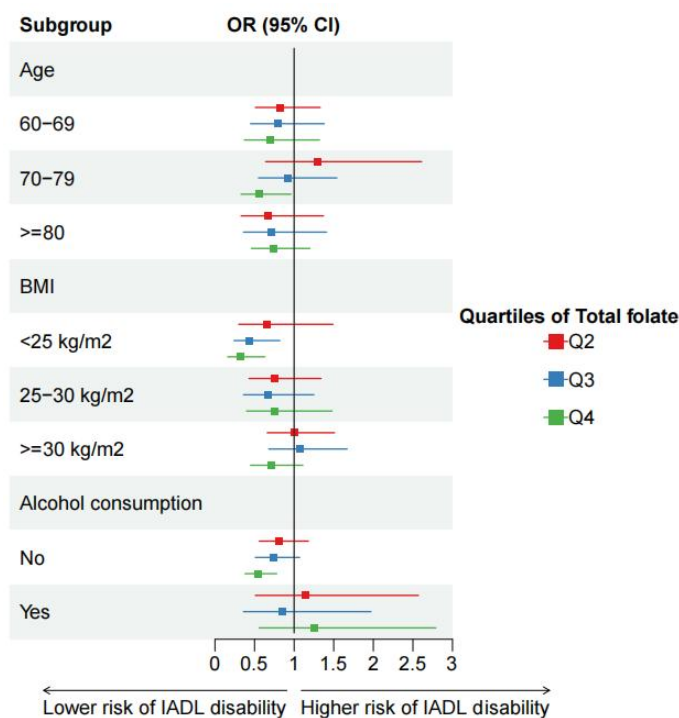

(a)

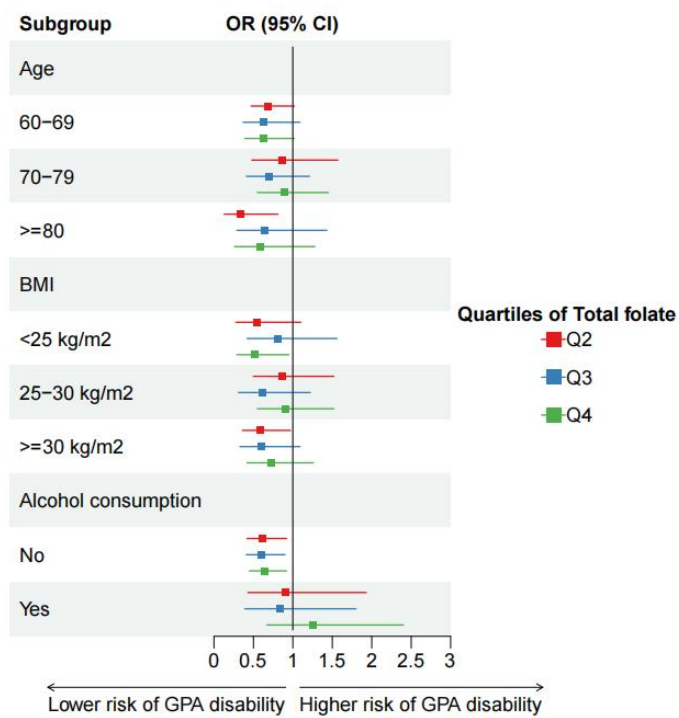

(b)

**Figure S1.** Subgroup analyses of the relationships (multivariate-adjusted odds ratios and 95% confidence intervals) between total folate and the risk of IADL disability (a) and GPA disability (b).

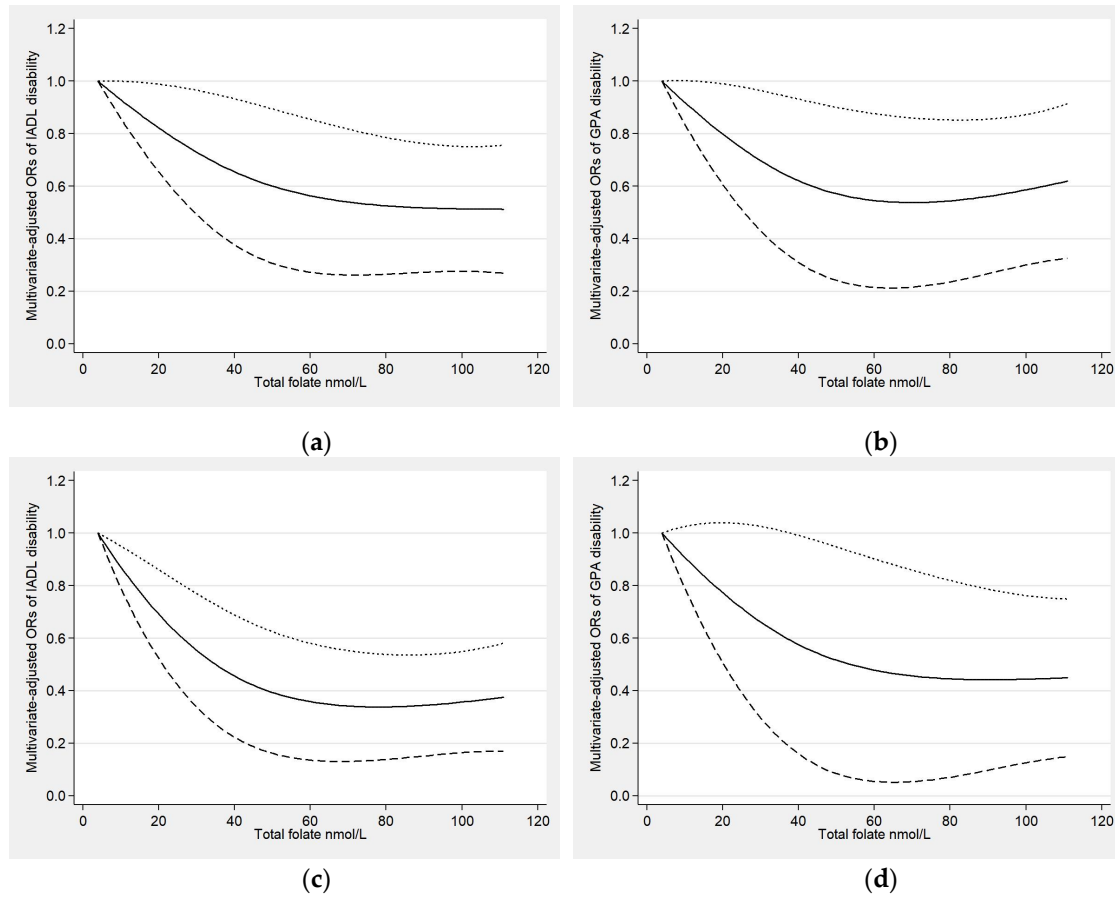

**Figure S2.** (a) Examination of the dose–response relationship between total folate and IADL disability ( $p$  for non-linearity = 0.296); (b) examination of the dose–response relationship between total folate and GPA disability ( $p$  for non-linearity = 0.154); (c) examination of the dose–response relationship between total folate and IADL disability in females ( $p$  for non-linearity = 0.047); (d) examination of the dose–response relationship between total folate and GPA disability in females ( $p$  for non-linearity = 0.345). The solid line and dashed lines represent the estimated odds ratios and the 95% confidence intervals.

## Reference

1. Garg, A.X.; Blake, P.G.; Clark, W.F.; Clase, C.M.; Haynes, R.B.; Moist, L.M. Association between renal insufficiency and malnutrition in older adults: results from the NHANES III. *Kidney international* **2001**, *60*, 1867-1874.
